# Supplementary material for: Design and preliminary analysis of a vaginal inserter for speculum-free cervical cancer screening
Source: PubMed Central journal article supplement (PMC5451045; doi:10.1371/journal.pone.0177782), 2017-05-31
Supplement: pone.0177782.s004.pdf [file pone.0177782.s004.pdf]

**Survey about perceptions regarding vaginal examinations**  
 → Survey to be completed **BEFORE** introduction of the Inserter

Date: \_\_\_\_\_

Site: \_\_\_\_\_

MRN: \_\_\_\_\_

Patient ID: \_\_\_\_\_

**Patient Pre-examination questionnaire:**

1. What is your age?

- <sub>1</sub> ≤29     
 <sub>2</sub> 30-34     
 <sub>3</sub> 35-39     
 <sub>4</sub> 40-44     
 <sub>5</sub> 45-49     
 <sub>6</sub> 50-54  
<sub>7</sub> 55-59     
 <sub>8</sub> 60-64     
 <sub>9</sub> ≥65

2. How many times have you had a vaginal examination performed with a speculum?

- <sub>1</sub> Never     
 <sub>2</sub> 1-2     
 <sub>3</sub> 3-5     
 <sub>4</sub> 6-10     
 <sub>5</sub> More than 10

3. Are you a regular user of Tampons or Menstrual cups? Yes/ No

4. How vaginal births have you had? \_\_\_\_\_

5. How much of a barrier, if any, do you consider speculums to be to you getting screened for cervical cancer?

- 1- not a barrier    2- small barrier    3- medium barrier    4-large barrier

We would like to know how acceptable or unacceptable you find various approaches and tools for screening for cervical cancer.

Check if no previous experience with the speculum:

**How willing are you to be screened for cervical cancer using:**

|                                                                                                                            | Not at all willing         | Slightly willing           | Very willing               | Extremely willing          |
|----------------------------------------------------------------------------------------------------------------------------|----------------------------|----------------------------|----------------------------|----------------------------|
| a. (From previous experience) The vaginal speculum. <i>Skip this question if no previous experience with the speculum.</i> | 1 <input type="checkbox"/> | 2 <input type="checkbox"/> | 3 <input type="checkbox"/> | 4 <input type="checkbox"/> |
| b. (Based of appearance only) the vaginal speculum                                                                         | 1 <input type="checkbox"/> | 2 <input type="checkbox"/> | 3 <input type="checkbox"/> | 4 <input type="checkbox"/> |
| c. (Based off appearance only), the inserter                                                                               | 1 <input type="checkbox"/> | 2 <input type="checkbox"/> | 3 <input type="checkbox"/> | 4 <input type="checkbox"/> |
| d. Physician examination with the speculum                                                                                 | 1 <input type="checkbox"/> | 2 <input type="checkbox"/> | 3 <input type="checkbox"/> | 4 <input type="checkbox"/> |
| e. Self-insertion with the speculum                                                                                        | 1 <input type="checkbox"/> | 2 <input type="checkbox"/> | 3 <input type="checkbox"/> | 4 <input type="checkbox"/> |
| f. Physician examination with the inserter                                                                                 | 1 <input type="checkbox"/> | 2 <input type="checkbox"/> | 3 <input type="checkbox"/> | 4 <input type="checkbox"/> |
| g. Self-examination with the inserter                                                                                      | 1 <input type="checkbox"/> | 2 <input type="checkbox"/> | 3 <input type="checkbox"/> | 4 <input type="checkbox"/> |

**We would like to hear about your preferences in cervical cancer screening.**

6. Select 3 for each question

|                                                                                                       | Cost                       | Procedure time             | Adequate assessment of cancer risk | Physician gender           | How comfortable the screening is | How long it takes to get to the clinic |
|-------------------------------------------------------------------------------------------------------|----------------------------|----------------------------|------------------------------------|----------------------------|----------------------------------|----------------------------------------|
| a. In your opinion, what are the 3 <b>most important</b> features for your cervical cancer screening? | 1 <input type="checkbox"/> | 2 <input type="checkbox"/> | 3 <input type="checkbox"/>         | 4 <input type="checkbox"/> | 5 <input type="checkbox"/>       | 6 <input type="checkbox"/>             |

7. Do you have any additional comments or feedback on the Inserter?

\_\_\_\_\_

\_\_\_\_\_

**Survey about Perceptions regarding vaginal examinations**  
 → Survey to be completed **AFTER** introduction of the Expander

**PLEASE READ:** Pay attention to whether you have any discomfort when you put the inserter in, when you take it out, and when you move it around to get a good picture of the cervix. It would also be helpful if you would pay attention to how easy or difficult using the inserter is.

Date: \_\_\_\_\_

Site: \_\_\_\_\_

8. When you put the inserter in, how much discomfort did you feel, if any?

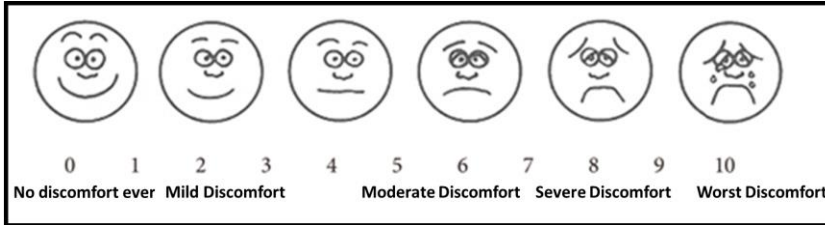

9. When you moved the inserter around to take a picture of your cervix, how much discomfort did you feel, if any?

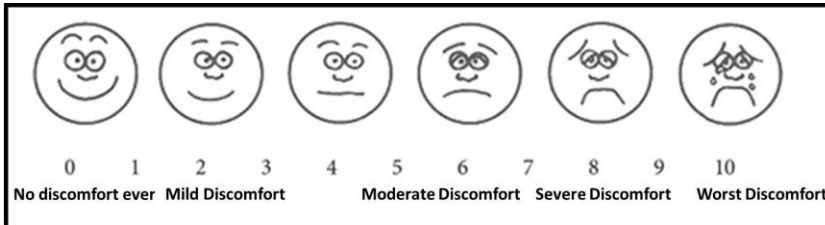

10. When you took the inserter out, how much discomfort did you feel, if any?

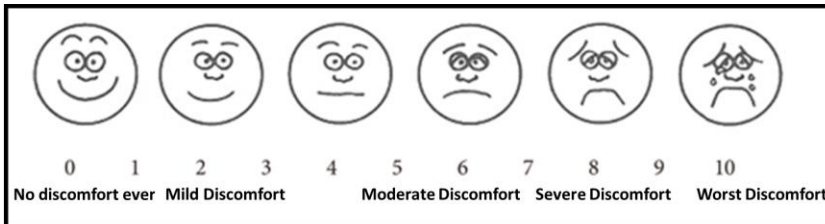

**We would like to hear more about your experience with the inserter.**

**11. Comparability Questions**

Check if no previous experience with the speculum:

**After having completed a cervical cancer screening using the inserter:**

|                                                                                                                                                  | Much worse                 | Slightly worse             | Slightly better            | Much better                |
|--------------------------------------------------------------------------------------------------------------------------------------------------|----------------------------|----------------------------|----------------------------|----------------------------|
| a. How did this experience compare to previous vaginal examinations you have had? <i>Skip this question if no previous vaginal examinations.</i> | 1 <input type="checkbox"/> | 2 <input type="checkbox"/> | 3 <input type="checkbox"/> | 4 <input type="checkbox"/> |
| b. In terms of <b>comfort</b> , how did the exam with the inserter compare to an exam with a speculum?                                           | 1 <input type="checkbox"/> | 2 <input type="checkbox"/> | 3 <input type="checkbox"/> | 4 <input type="checkbox"/> |
| c. In terms of <b>ease</b> , how did examination with inserter compare to examination with speculum?                                             | 1 <input type="checkbox"/> | 2 <input type="checkbox"/> | 3 <input type="checkbox"/> | 4 <input type="checkbox"/> |
| d. Would you say overall that the inserter is better or worse than the speculum?                                                                 | 1 <input type="checkbox"/> | 2 <input type="checkbox"/> | 3 <input type="checkbox"/> | 4 <input type="checkbox"/> |

12. We would love to hear any feedback you have on the inserter that might help us make it better. Please share any thoughts you have.

\_\_\_\_\_

\_\_\_\_\_

**Survey about perceptions regarding vaginal examinations**  
 → Survey to be completed **BEFORE** introduction of the Inserter

**Clinician Pre examination Questionnaire**

Date: \_\_\_\_\_  
 Site: \_\_\_\_\_

First, please help us understand more about your experiences in healthcare.

1. **What is your current medical position?**  
<sub>1</sub> General Physician      <sub>2</sub> Nurse      <sub>3</sub> Physician Assistant  
<sub>4</sub> Ob-Gyn      <sub>5</sub> Other \_\_\_\_\_
2. **How many years have you been working in health care delivery?** \_\_\_\_\_
3. **How many years have you been providing cervical cancer screening?** \_\_\_\_\_
4. **Are you currently a resident or trainee?**      <sub>1</sub> Yes      <sub>2</sub> No
5. **Are you male or female?**      <sub>1</sub> Female      <sub>2</sub> Male
6. **What is your age?** <sub>1</sub> ≤29   <sub>2</sub> 30-34   <sub>3</sub> 35-39   <sub>4</sub> 40-44   <sub>5</sub> 45-49  
<sub>6</sub> 50-54   <sub>7</sub> 55-59   <sub>8</sub> 60-64   <sub>9</sub> ≥65
7. **Where do you practice? *Select all that apply.***  
<sub>1</sub> Public hospital      <sub>2</sub> Private office      <sub>3</sub> Private hospital      <sub>4</sub> Other (*please name*): \_\_\_\_\_

We would like to hear about your preferences in cervical cancer screening.

8. **Select 3 for each question**

|                                                                                                           | Cost to the patient        | Procedure time             | Cost of the device         | Training requirements      | Maintenance costs          | Ease of use                | Physician comfort          | Patient comfort            | Quality of visualization of cervix | Device size                 |
|-----------------------------------------------------------------------------------------------------------|----------------------------|----------------------------|----------------------------|----------------------------|----------------------------|----------------------------|----------------------------|----------------------------|------------------------------------|-----------------------------|
| a. In your opinion, what are the 3 <b>most important</b> features for cervical cancer screening devices?  | 1 <input type="checkbox"/> | 2 <input type="checkbox"/> | 3 <input type="checkbox"/> | 4 <input type="checkbox"/> | 5 <input type="checkbox"/> | 6 <input type="checkbox"/> | 7 <input type="checkbox"/> | 8 <input type="checkbox"/> | 9 <input type="checkbox"/>         | 10 <input type="checkbox"/> |
| b. In your opinion, what are the 3 <b>least important</b> features for cervical cancer screening devices? | 1 <input type="checkbox"/> | 2 <input type="checkbox"/> | 3 <input type="checkbox"/> | 4 <input type="checkbox"/> | 5 <input type="checkbox"/> | 6 <input type="checkbox"/> | 7 <input type="checkbox"/> | 8 <input type="checkbox"/> | 9 <input type="checkbox"/>         | 10 <input type="checkbox"/> |

This next section asks you about your experiences with the vaginal speculum.

9. **Do you use a speculum in your current screening procedures?**  
<sub>1</sub> Yes      <sub>2</sub> No  
 (If “no,” skip to question 10)

|                                                       | Metal Cusco                | Plastic Cusco              | Metal Graves               | Plastic Graves             | Metal Pederson             | Plastic Pederson           |
|-------------------------------------------------------|----------------------------|----------------------------|----------------------------|----------------------------|----------------------------|----------------------------|
| a. Which speculum types have you had experience with? | 1 <input type="checkbox"/> | 2 <input type="checkbox"/> | 3 <input type="checkbox"/> | 4 <input type="checkbox"/> | 5 <input type="checkbox"/> | 6 <input type="checkbox"/> |
| b. Which types do you currently use                   | 1 <input type="checkbox"/> | 2 <input type="checkbox"/> | 3 <input type="checkbox"/> | 4 <input type="checkbox"/> | 5 <input type="checkbox"/> | 6 <input type="checkbox"/> |

10. **According to your patients, how much of a barrier to cervical cancer screening is each of the following?**

|                                                                                | Not a barrier              | Small barrier              | Medium barrier             | Large barrier              |
|--------------------------------------------------------------------------------|----------------------------|----------------------------|----------------------------|----------------------------|
| a. Male medical professional performing the exam?                              | 1 <input type="checkbox"/> | 2 <input type="checkbox"/> | 3 <input type="checkbox"/> | 4 <input type="checkbox"/> |
| b. Fear of pain from the speculum?                                             | 1 <input type="checkbox"/> | 2 <input type="checkbox"/> | 3 <input type="checkbox"/> | 4 <input type="checkbox"/> |
| c. Access to a healthcare facility with cervical cancer screening?             | 1 <input type="checkbox"/> | 2 <input type="checkbox"/> | 3 <input type="checkbox"/> | 4 <input type="checkbox"/> |
| d. Cost of the cervical cancer screening?                                      | 1 <input type="checkbox"/> | 2 <input type="checkbox"/> | 3 <input type="checkbox"/> | 4 <input type="checkbox"/> |
| e. Lack of awareness of the need for cervical cancer screening?                | 1 <input type="checkbox"/> | 2 <input type="checkbox"/> | 3 <input type="checkbox"/> | 4 <input type="checkbox"/> |
| f. Lack of knowledge about what cervical cancer screening involves?            | 1 <input type="checkbox"/> | 2 <input type="checkbox"/> | 3 <input type="checkbox"/> | 4 <input type="checkbox"/> |
| g. Religious beliefs?                                                          | 1 <input type="checkbox"/> | 2 <input type="checkbox"/> | 3 <input type="checkbox"/> | 4 <input type="checkbox"/> |
| h. The time it takes to complete the procedure?                                | 1 <input type="checkbox"/> | 2 <input type="checkbox"/> | 3 <input type="checkbox"/> | 4 <input type="checkbox"/> |
| i. The time it takes to receive treatment, if the test indicates it is needed? | 1 <input type="checkbox"/> | 2 <input type="checkbox"/> | 3 <input type="checkbox"/> | 4 <input type="checkbox"/> |
| j. Husband’s reluctance for his wife to be screened?                           | 1 <input type="checkbox"/> | 2 <input type="checkbox"/> | 3 <input type="checkbox"/> | 4 <input type="checkbox"/> |

**Survey about Perceptions regarding vaginal examinations**  
 → Survey to be completed **AFTER** introduction of the Expander

**Clinician Post examination Questionnaire**

Date: \_\_\_\_\_  
 Site: \_\_\_\_\_

| 1. Please compare the <i>Inserter</i> to the device you usually use.<br>Compared to your usual device,                 | Worse                      | Same                       | Better                     |
|------------------------------------------------------------------------------------------------------------------------|----------------------------|----------------------------|----------------------------|
| a. Ease of using the <i>Inserter</i> was                                                                               | 1 <input type="checkbox"/> | 2 <input type="checkbox"/> | 3 <input type="checkbox"/> |
| b. Length of time needed to perform the procedure was                                                                  | 1 <input type="checkbox"/> | 2 <input type="checkbox"/> | 3 <input type="checkbox"/> |
| c. The training required for the <i>Inserter</i> was                                                                   | 1 <input type="checkbox"/> | 2 <input type="checkbox"/> | 3 <input type="checkbox"/> |
| d. The form factor (for translator to know: ergonomics, how it feels to hold) of the device of the <i>Inserter</i> was | 1 <input type="checkbox"/> | 2 <input type="checkbox"/> | 3 <input type="checkbox"/> |
| e. The size of the <i>Inserter</i> was                                                                                 | 1 <input type="checkbox"/> | 2 <input type="checkbox"/> | 3 <input type="checkbox"/> |
| f. The clinical workflow while using the <i>Inserter</i> was                                                           | 1 <input type="checkbox"/> | 2 <input type="checkbox"/> | 3 <input type="checkbox"/> |
| g. Overall, compared to your usual device, the <i>Inserter</i> was                                                     | 1 <input type="checkbox"/> | 2 <input type="checkbox"/> | 3 <input type="checkbox"/> |

| 2. How difficult or easy did you find each of the following?<br><br>How difficult or easy was it to... | Very Difficult             | Somewhat Difficult         | Somewhat easy              | Very easy                  | I didn't do this           |
|--------------------------------------------------------------------------------------------------------|----------------------------|----------------------------|----------------------------|----------------------------|----------------------------|
| a. insert the <i>Inserter</i> ?                                                                        | 1 <input type="checkbox"/> | 2 <input type="checkbox"/> | 3 <input type="checkbox"/> | 4 <input type="checkbox"/> | 5 <input type="checkbox"/> |
| b. expand the vaginal walls with the <i>Inserter</i> ?                                                 | 1 <input type="checkbox"/> | 2 <input type="checkbox"/> | 3 <input type="checkbox"/> | 4 <input type="checkbox"/> | 5 <input type="checkbox"/> |
| c. manipulate the <i>Inserter</i> to find the cervix?                                                  | 1 <input type="checkbox"/> | 2 <input type="checkbox"/> | 3 <input type="checkbox"/> | 4 <input type="checkbox"/> | 5 <input type="checkbox"/> |
| d. remove the <i>Inserter</i> from the vagina?                                                         | 1 <input type="checkbox"/> | 2 <input type="checkbox"/> | 3 <input type="checkbox"/> | 4 <input type="checkbox"/> | 5 <input type="checkbox"/> |
| e. capture images with the <i>Inserter</i> and POCkeT Colposcope                                       | 1 <input type="checkbox"/> | 2 <input type="checkbox"/> | 3 <input type="checkbox"/> | 4 <input type="checkbox"/> | 5 <input type="checkbox"/> |
| f. clean the <i>Inserter</i> ?                                                                         | 1 <input type="checkbox"/> | 2 <input type="checkbox"/> | 3 <input type="checkbox"/> | 4 <input type="checkbox"/> | 5 <input type="checkbox"/> |
| g. sterilize the <i>Inserter</i> ?                                                                     | 1 <input type="checkbox"/> | 2 <input type="checkbox"/> | 3 <input type="checkbox"/> | 4 <input type="checkbox"/> | 5 <input type="checkbox"/> |

3. How confident are you in your ability to operate the *Inserter*?  
1 Not at all confident   2 Slightly confident   3 Moderately confident   4 Very confident   5 Extremely confident

4. Would you use the *Inserter* in your practice routinely/recommend it to patients?  
1 YES   2 NO  
 Please explain:

---



---

5. Would you like your hospital to purchase an *Inserter*?  
1 YES   2 NO  
 Please explain:

---



---

6. Do you have any additional comments or feedback on the *Inserter*?

---



---
